# Supplementary material for: Self-harm presentation across healthcare settings by sex in young people: an e-cohort study using routinely collected linked healthcare data in Wales, UK
Source: PubMed Central journal article supplement (PMC7146921; doi:10.1136/archdischild-2019-317248), 2019-10-14
Supplement: archdischild-2019-317248supp002.pdf [file archdischild-2019-317248supp002.pdf]

**Appendix B: Read codes used to identify self-harm in GP data**

| Read Code | Description                                                   |
|-----------|---------------------------------------------------------------|
| 14K1.     | Intentional overdose of prescription only medication          |
| SL...     | Overdose of biological substance                              |
| SL90.     | Antidepressant poisoning                                      |
| SL900     | Amitriptyline poisoning                                       |
| SL901     | Imipramine poisoning                                          |
| SL902     | Monoamine poisoning                                           |
| SL903     | Trazodone poisoning                                           |
| SL90z     | Anti-depressant poisoning NOS                                 |
| TK...     | Suicide and self inflicted injury                             |
| TK0..     | Suicide + self inflicted poisoning by solid/liquid substances |
| TK00.     | Suicide + self inflicted poisoning by analgesic/antipyretic   |
| TK01.     | Suicide + self inflicted poisoning by barbiturates            |
| TK010     | Suicide and self inflicted injury by Amylobarbitone           |
| TK011     | Suicide and self inflicted injury by Barbitone                |
| TK014     | Suicide and self inflicted injury by Phenobarbitone           |
| TK02.     | Suicide + self inflicted poisoning by oth sedatives/hypnotics |
| TK03.     | Suicide + self inflicted poisoning tranquilliser/psychotropic |
| TK04.     | Suicide + self inflicted poisoning by other drugs/medicines   |
| TK05.     | Suicide + self inflicted poisoning by drug or medicine NOS    |
| TK06.     | Suicide + self inflicted poisoning by agricultural chemical   |
| TK07.     | Suicide + self inflicted poisoning by corrosive/caustic subst |

|       |                                                               |
|-------|---------------------------------------------------------------|
| TK0z. | Suicide + self inflicted poisoning by solid/liquid subst NOS  |
| TK1.. | Suicide + self inflicted poisoning by gases in domestic use   |
| TK10. | Suicide + self inflicted poisoning by gas via pipeline        |
| TK11. | Suicide + self inflicted poisoning by liquified petrol gas    |
| TK1y. | Suicide and self inflicted poisoning by other utility gas     |
| TK1z. | Suicide + self inflicted poisoning by domestic gases NOS      |
| TK2.. | Suicide + self inflicted poisoning by other gases and vapours |
| TK20. | Suicide + self inflicted poisoning by motor veh exhaust gas   |
| TK21. | Suicide and self inflicted poisoning by other carbon monoxide |
| TK2z. | Suicide + self inflicted poisoning by gases and vapours NOS   |
| TK3.. | Suicide + self inflicted injury by hang/strangulate/suffocate |
| TK30. | Suicide and self inflicted injury by hanging                  |
| TK31. | Suicide + self inflicted injury by suffocation by plastic bag |
| TK3y. | Suicide + self inflicted inj oth mean hang/strangle/suffocate |
| TK3z. | Suicide + self inflicted inj by hang/strangle/suffocate NOS   |
| TK4.. | Suicide and self inflicted injury by drowning                 |
| TK5.. | Suicide and self inflicted injury by firearms and explosives  |
| TK51. | Suicide and self inflicted injury by shotgun                  |
| TK52. | Suicide and self inflicted injury by hunting rifle            |
| TK54. | Suicide and self inflicted injury by other firearm            |

|       |                                                               |
|-------|---------------------------------------------------------------|
| TK5z. | Suicide and self inflicted injury by firearms/explosives NOS  |
| TK6.. | Suicide and self inflicted injury by cutting and stabbing     |
| TK60. | Suicide and self inflicted injury by cutting                  |
| TK601 | Self inflicted lacerations to wrist                           |
| TK61. | Suicide and self inflicted injury by stabbing                 |
| TK6z. | Suicide and self inflicted injury by cutting and stabbing NOS |
| TK7.. | Suicide and self inflicted injury by jumping from high place  |
| TK70. | Suicide+self inflicted injury-jump from residential premises  |
| TK71. | Suicide+self inflicted injury-jump from oth manmade structure |
| TK72. | Suicide+self inflicted injury-jump from natural sites         |
| TK7z. | Suicide+self inflicted injury-jump from high place NOS        |
| TKx.. | Suicide and self inflicted injury by other means              |
| TKx0. | Suicide + self inflicted injury-jump/lie before moving object |
| TKx00 | Suicide + self inflicted injury-jumping before moving object  |
| TKx1. | Suicide and self inflicted injury by burns or fire            |
| TKx2. | Suicide and self inflicted injury by scald                    |
| TKx3. | Suicide and self inflicted injury by extremes of cold         |
| TKx4. | Suicide and self inflicted injury by electrocution            |
| TKx5. | Suicide and self inflicted injury by crashing motor vehicle   |
| TKx6. | Suicide and self inflicted injury by crashing of aircraft     |
| TKx7. | Suicide and self inflicted injury caustic subst, excl poison  |

|       |                                                                                                                                               |
|-------|-----------------------------------------------------------------------------------------------------------------------------------------------|
| TKxy. | Suicide and self inflicted injury by other specified means                                                                                    |
| TKxz. | Suicide and self inflicted injury by other means NOS                                                                                          |
| TKy.. | Late effects of self inflicted injury                                                                                                         |
| TKz.. | Suicide and self inflicted injury NOS                                                                                                         |
| U2... | [X]Intentional self-harm                                                                                                                      |
| U20.. | [X]Intentional self poisoning by and exposure to noxious substances                                                                           |
| U200. | [X]Intentional self poisoning by and exposure to nonopioid analgesics                                                                         |
| U2000 | [X]Intentional self poisoning by and exposure to nonopioid analgesics, occurrence at home                                                     |
| U2001 | [X]Intentional self poisoning by and exposure to nonopioid analgesics, occurrence in residential institution                                  |
| U2002 | [X]Intentional self poisoning by and exposure to nonopioid analgesics, occurrence at school, other institution and public administrative area |
| U2003 | [X]Intentional self poisoning by and exposure to nonopioid analgesics, occurrence at sports and athletics area                                |
| U2004 | [X]Intentional self poisoning by and exposure to nonopioid analgesics, occurrence on street and highway                                       |
| U2005 | [X]Intentional self poisoning by and exposure to nonopioid analgesics, occurrence at trade and service area                                   |
| U2006 | [X]Intentional self poisoning by and exposure to nonopioid analgesics, occurrence at industrial and construction area                         |
| U2007 | [X]Intentional self poisoning by and exposure to nonopioid analgesics, occurrence on farm                                                     |
| U200y | [X]Intentional self poisoning by and exposure to nonopioid analgesics, occurrence at other specified place                                    |

|       |                                                                                                                                         |
|-------|-----------------------------------------------------------------------------------------------------------------------------------------|
| U200z | [X]Intentional self poisoning by and exposure to nonopioid analgesics, occurrence at unspecified place                                  |
| U201. | [X]Intentional self poisoning by and exposure to antiepileptics                                                                         |
| U2010 | [X]Intentional self poisoning by and exposure to antiepileptics, occurrence at home                                                     |
| U2011 | [X]Intentional self poisoning by and exposure to antiepileptics, occurrence in residential institution                                  |
| U2012 | [X]Intentional self poisoning by and exposure to antiepileptics, occurrence at school, other institution and public administrative area |
| U2013 | [X]Intentional self poisoning by and exposure to antiepileptics, occurrence at sports and athletics area                                |
| U2014 | [X]Intentional self poisoning by and exposure to antiepileptics, occurrence on street and highway                                       |
| U2015 | [X]Intentional self poisoning by and exposure to antiepileptics, occurrence at trade and service area                                   |
| U2016 | [X]Intentional self poisoning by and exposure to antiepileptics, occurrence at industrial and construction area                         |
| U2017 | [X]Intentional self poisoning by and exposure to antiepileptics, occurrence on farm                                                     |
| U201y | [X]Intentional self poisoning by and exposure to antiepileptics, occurrence at other specified place                                    |
| U201z | [X]Intentional self poisoning by and exposure to antiepileptics, occurrence at unspecified place                                        |
| U202. | [X]Intentional self poisoning by and exposure to sedative hypnotics                                                                     |
| U2020 | [X]Intentional self poisoning by and exposure to sedative hypnotics, occurrence at home                                                 |
| U2021 | [X]Intentional self poisoning by and exposure to sedative hypnotics, occurrence in residential institution                              |

|       |                                                                                                                                              |
|-------|----------------------------------------------------------------------------------------------------------------------------------------------|
| U2022 | [X]Intentional self poisoning by and exposure to sedative hypnotics, occurrence at school, other institution and public administrative area  |
| U2023 | [X]Intentional self poisoning by and exposure to sedative hypnotics, occurrence at sports and athletics area                                 |
| U2024 | [X]Intentional self poisoning by and exposure to sedative hypnotics, occurrence on street and highway                                        |
| U2025 | [X]Intentional self poisoning by and exposure to sedative hypnotics, occurrence at trade and service area                                    |
| U2026 | [X]Intentional self poisoning by and exposure to sedative hypnotics, occurrence at industrial and construction area                          |
| U2027 | [X]Intentional self poisoning by and exposure to sedative hypnotics, occurrence on farm                                                      |
| U202y | [X]Intentional self poisoning by and exposure to sedative hypnotics, occurrence at other specified place                                     |
| U202z | [X]Intentional self poisoning by and exposure to sedative hypnotics, occurrence at unspecified place                                         |
| U203. | [X]Intentional self poisoning by and exposure to antiparkinson drugs                                                                         |
| U2030 | [X]Intentional self poisoning by and exposure to antiparkinson drugs, occurrence at home                                                     |
| U2031 | [X]Intentional self poisoning by and exposure to antiparkinson drugs, occurrence in residential institution                                  |
| U2032 | [X]Intentional self poisoning by and exposure to antiparkinson drugs, occurrence at school, other institution and public administrative area |
| U2033 | [X]Intentional self poisoning by and exposure to antiparkinson drugs, occurrence at sports and athletics area                                |
| U2034 | [X]Intentional self poisoning by and exposure to antiparkinson drugs, occurrence on street and highway                                       |

|       |                                                                                                                                             |
|-------|---------------------------------------------------------------------------------------------------------------------------------------------|
| U2035 | [X]Intentional self poisoning by and exposure to antiparkinson drugs, occurrence at trade and service area                                  |
| U2036 | [X]Intentional self poisoning by and exposure to antiparkinson drugs, occurrence at industrial and construction area                        |
| U2037 | [X]Intentional self poisoning by and exposure to antiparkinson drugs, occurrence on farm                                                    |
| U203y | [X]Intentional self poisoning by and exposure to antiparkinson drugs, occurrence at other specified place                                   |
| U203z | [X]Intentional self poisoning by and exposure to antiparkinson drugs, occurrence at unspecified place                                       |
| U204. | [X]Intentional self poisoning by and exposure to psychotropic drugs                                                                         |
| U2040 | [X]Intentional self poisoning by and exposure to psychotropic drugs, occurrence at home                                                     |
| U2041 | [X]Intentional self poisoning by and exposure to psychotropic drugs, occurrence in residential institution                                  |
| U2042 | [X]Intentional self poisoning by and exposure to psychotropic drugs, occurrence at school, other institution and public administrative area |
| U2043 | [X]Intentional self poisoning by and exposure to psychotropic drugs, occurrence at sports and athletics area                                |
| U2044 | [X]Intentional self poisoning by and exposure to psychotropic drugs, occurrence on street and highway                                       |
| U2045 | [X]Intentional self poisoning by and exposure to psychotropic drugs, occurrence at trade and service area                                   |
| U2046 | [X]Intentional self poisoning by and exposure to psychotropic drugs, occurrence at industrial and construction area                         |
| U2047 | [X]Intentional self poisoning by and exposure to psychotropic drugs, occurrence on farm                                                     |

|       |                                                                                                                                         |
|-------|-----------------------------------------------------------------------------------------------------------------------------------------|
| U204y | [X]Intentional self poisoning by and exposure to psychotropic drugs, occurrence at other specified place                                |
| U204z | [X]Intentional self poisoning by and exposure to psychotropic drugs, occurrence at unspecified place                                    |
| U205. | [X]Intentional self poisoning by and exposure to narcotic drugs                                                                         |
| U2050 | [X]Intentional self poisoning by and exposure to narcotic drugs, occurrence at home                                                     |
| U2051 | [X]Intentional self poisoning by and exposure to narcotic drugs, occurrence in residential institution                                  |
| U2052 | [X]Intentional self poisoning by and exposure to narcotic drugs, occurrence at school, other institution and public administrative area |
| U2053 | [X]Intentional self poisoning by and exposure to narcotic drugs, occurrence at sports and athletics area                                |
| U2054 | [X]Intentional self poisoning by and exposure to narcotic drugs, occurrence on street and highway                                       |
| U2055 | [X]Intentional self poisoning by and exposure to narcotic drugs, occurrence at trade and service area                                   |
| U2056 | [X]Intentional self poisoning by and exposure to narcotic drugs, occurrence at industrial and construction area                         |
| U2057 | [X]Intentional self poisoning by and exposure to narcotic drugs, occurrence on farm                                                     |
| U205y | [X]Intentional self poisoning by and exposure to narcotic drugs, occurrence at other specified place                                    |
| U205z | [X]Intentional self poisoning by and exposure to narcotic drugs, occurrence at unspecified place                                        |
| U206. | [X]Intentional self poisoning by and exposure to hallucinogens                                                                          |
| U2060 | [X]Intentional self poisoning by and exposure to hallucinogens, occurrence at home                                                      |



|       |                                                                                                                                                |
|-------|------------------------------------------------------------------------------------------------------------------------------------------------|
| U2061 | [X]Intentional self poisoning by and exposure to hallucinogens, occurrence in residential institution                                          |
| U2062 | [X]Intentional self poisoning by and exposure to hallucinogens, occurrence at school, other institution and public administrative area         |
| U2063 | [X]Intentional self poisoning by and exposure to hallucinogens, occurrence at sports and athletics area                                        |
| U2064 | [X]Intentional self poisoning by and exposure to hallucinogens, occurrence on street and highway                                               |
| U2065 | [X]Intentional self poisoning by and exposure to hallucinogens, occurrence at trade and service area                                           |
| U2066 | [X]Intentional self poisoning by and exposure to hallucinogens, occurrence at industrial and construction area                                 |
| U2067 | [X]Intentional self poisoning by and exposure to hallucinogens, occurrence on farm                                                             |
| U206y | [X]Intentional self poisoning by and exposure to hallucinogens, occurrence at other specified place                                            |
| U206z | [X]Intentional self poisoning by and exposure to hallucinogens, occurrence at unspecified place                                                |
| U207. | [X]Intentional self poisoning by and exposure to other autonomic drugs                                                                         |
| U2070 | [X]Intentional self poisoning by and exposure to other autonomic drugs, occurrence at home                                                     |
| U2071 | [X]Intentional self poisoning by and exposure to other autonomic drugs, occurrence in residential institution                                  |
| U2072 | [X]Intentional self poisoning by and exposure to other autonomic drugs, occurrence at school, other institution and public administrative area |
| U2073 | [X]Intentional self poisoning by and exposure to other autonomic drugs, occurrence at sports and athletics area                                |

|       |                                                                                                                                                                                          |
|-------|------------------------------------------------------------------------------------------------------------------------------------------------------------------------------------------|
| U2074 | [X]Intentional self poisoning by and exposure to other autonomic drugs, occurrence on street and highway                                                                                 |
| U2075 | [X]Intentional self poisoning by and exposure to other autonomic drugs, occurrence at trade and service area                                                                             |
| U2076 | [X]Intentional self poisoning by and exposure to other autonomic drugs, occurrence at industrial and construction area                                                                   |
| U2077 | [X]Intentional self poisoning by and exposure to other autonomic drugs, occurrence on farm                                                                                               |
| U207y | [X]Intentional self poisoning by and exposure to other autonomic drugs, occurrence at other specified place                                                                              |
| U207z | [X]Intentional self poisoning by and exposure to other autonomic drugs, occurrence at unspecified place                                                                                  |
| U208. | [X]Intentional self poisoning by and exposure to other and unspecified drug, medicament and biological substance                                                                         |
| U2080 | [X]Intentional self poisoning by and exposure to other and unspecified drug, medicament and biological substance, occurrence at home                                                     |
| U2081 | [X]Intentional self poisoning by and exposure to other and unspecified drug, medicament and biological substance, occurrence in residential institution                                  |
| U2082 | [X]Intentional self poisoning by and exposure to other and unspecified drug, medicament and biological substance, occurrence at school, other institution and public administrative area |
| U2083 | [X]Intentional self poisoning by and exposure to other and unspecified drug, medicament and biological substance, occurrence at sports and athletics area                                |
| U2084 | [X]Intentional self poisoning by and exposure to other and unspecified drug, medicament and biological substance, occurrence on street and highway                                       |
| U2085 | [X]Intentional self poisoning by and exposure to other and unspecified drug, medicament and                                                                                              |

|       |                                                                                                                                                                                          |
|-------|------------------------------------------------------------------------------------------------------------------------------------------------------------------------------------------|
|       | biological substance, occurrence at trade and service area                                                                                                                               |
| U2086 | [X]Intentional self poisoning by and exposure to other and unspecified drug, medicament and biological substance, occurrence at industrial and construction area                         |
| U2087 | [X]Intentional self poisoning by and exposure to other and unspecified drug, medicament and biological substance, occurrence on farm                                                     |
| U208y | [X]Intentional self poisoning by and exposure to other and unspecified drug, medicament and biological substance, occurrence at other specified place                                    |
| U208z | [X]Intentional self poisoning by and exposure to other and unspecified drug, medicament and biological substance, occurrence at unspecified place                                        |
| U20A. | [X]Intentional self poisoning by and exposure to organic solvents and halogenated hydrocarbons and their vapours                                                                         |
| U20A0 | [X]Intentional self poisoning by and exposure to organic solvents and halogenated hydrocarbons and their vapours, occurrence at home                                                     |
| U20A1 | [X]Intentional self poisoning by and exposure to organic solvents and halogenated hydrocarbons and their vapours, occurrence in residential institution                                  |
| U20A2 | [X]Intentional self poisoning by and exposure to organic solvents and halogenated hydrocarbons and their vapours, occurrence at school, other institution and public administrative area |
| U20A3 | [X]Intentional self poisoning by and exposure to organic solvents and halogenated hydrocarbons and their vapours, halogens, occurrence at sports and athletics area                      |
| U20A4 | [X]Intentional self poisoning by and exposure to organic solvents and halogenated hydrocarbons and their vapours, occurrence on street and highway                                       |
| U20A5 | [X]Intentional self poisoning by and exposure to organic solvents and halogenated hydrocarbons                                                                                           |

|       |                                                                                                                                                                  |
|-------|------------------------------------------------------------------------------------------------------------------------------------------------------------------|
|       | and their vapours, occurrence at trade and service area                                                                                                          |
| U20A6 | [X]Intentional self poisoning by and exposure to organic solvents and halogenated hydrocarbons and their vapours, occurrence at industrial and construction area |
| U20A7 | [X]Intentional self poisoning by and exposure to organic solvents and halogenated hydrocarbons and their vapours, occurrence on farm                             |
| U20Ay | [X]Intentional self poisoning by and exposure to organic solvents and halogenated hydrocarbons and their vapours, occurrence at other specified place            |
| U20Az | [X]Intentional self poisoning by and exposure to organic solvents and halogenated hydrocarbons and their vapours, halogens, occurrence at unspecified place      |
| U20B. | [X]Intentional self poisoning by and exposure to other gas and vapours                                                                                           |
| U20B0 | [X]Intentional self poisoning by and exposure to other gas and vapours, occurrence at home                                                                       |
| U20B1 | [X]Intentional self poisoning by and exposure to other gas and vapours, occurrence in residential institution                                                    |
| U20B2 | [X]Intentional self poisoning by and exposure to other gas and vapour, occurrence at school, other institution and public administrative area                    |
| U20B3 | [X]Intentional self poisoning by and exposure to other gas and vapour, occurrence at sports and athletics area                                                   |
| U20B4 | [X]Intentional self poisoning by and exposure to other gas and vapour, occurrence on street and highway                                                          |
| U20B5 | [X]Intentional self poisoning by and exposure to other gas and vapour, occurrence at trade and service area                                                      |
| U20B6 | [X]Intentional self poisoning by and exposure to other gas and vapour, occurrence at industrial and construction area                                            |

|       |                                                                                                                                     |
|-------|-------------------------------------------------------------------------------------------------------------------------------------|
| U20B7 | [X]Intentional self poisoning by and exposure to other gas and vapour, occurrence on farm                                           |
| U20By | [X]Intentional self poisoning by and exposure to other gas and vapour, occurrence at other specified place                          |
| U20Bz | [X]Intentional self poisoning by and exposure to other gas and vapour, occurrence at unspecified place                              |
| U20C. | [X]Intentional self poisoning by and exposure to pesticides                                                                         |
| U20C0 | [X]Intentional self poisoning by and exposure to pesticides, occurrence at home                                                     |
| U20C1 | [X]Intentional self poisoning by and exposure to pesticides, occurrence in residential institution                                  |
| U20C2 | [X]Intentional self poisoning by and exposure to pesticides, occurrence at school, other institution and public administrative area |
| U20C3 | [X]Intentional self poisoning by and exposure to pesticides, occurrence at sports and athletics area                                |
| U20C4 | [X]Intentional self poisoning by and exposure to pesticides, occurrence on street and highway                                       |
| U20C5 | [X]Intentional self poisoning by and exposure to pesticides, occurrence at trade and service area                                   |
| U20C6 | [X]Intentional self poisoning by and exposure to pesticides, occurrence at industrial and construction area                         |
| U20C7 | [X]Intentional self poisoning by and exposure to pesticides, occurrence on farm                                                     |
| U20Cy | [X]Intentional self poisoning by and exposure to pesticides, occurrence at other specified place                                    |
| U20Cz | [X]Intentional self poisoning by and exposure to pesticides, occurrence at unspecified place                                        |
| U20y. | [X]Intentional self poisoning by and exposure to other and unspecified chemicals and noxious substances                             |
| U20y0 | [X]Intentional self poisoning by and exposure to other and unspecified chemicals and noxious substances, occurrence at home         |

|       |                                                                                                                                                                                 |
|-------|---------------------------------------------------------------------------------------------------------------------------------------------------------------------------------|
| U20y1 | [X]Intentional self poisoning by and exposure to other and unspecified chemicals and noxious substances, occurrence in residential institution                                  |
| U20y2 | [X]Intentional self poisoning by and exposure to other and unspecified chemicals and noxious substances, occurrence at school, other institution and public administrative area |
| U20y3 | [X]Intentional self poisoning by and exposure to other and unspecified chemicals and noxious substances, occurrence at sports and athletics area                                |
| U20y4 | [X]Intentional self poisoning by and exposure to other and unspecified chemicals and noxious substances, occurrence on street and highway                                       |
| U20y5 | [X]Intentional self poisoning by and exposure to other and unspecified chemicals and noxious substances, occurrence at trade and service area                                   |
| U20y6 | [X]Intentional self poisoning by and exposure to other and unspecified chemicals and noxious substances, occurrence at industrial and construction area                         |
| U20y7 | [X]Intentional self poisoning by and exposure to other and unspecified chemicals and noxious substances, occurrence on farm                                                     |
| U20yy | [X]Intentional self poisoning by and exposure to other and unspecified chemicals and noxious substances, occurrence at other specified place                                    |
| U20yz | [X]Intentional self poisoning by and exposure to other and unspecified chemicals and noxious substances, occurrence at unspecified place                                        |
| U21.. | [X]Intentional self harm by hanging, strangulation and suffocation                                                                                                              |
| U210. | [X]Intentional self harm by hanging, strangulation and suffocation, occurrence at home                                                                                          |
| U211. | [X]Intentional self harm by hanging, strangulation and suffocation, occurrence in residential institution                                                                       |
| U212. | [X]Intentional self harm by hanging, strangulation and suffocation, occurrence at                                                                                               |

|       |                                                                                                                             |
|-------|-----------------------------------------------------------------------------------------------------------------------------|
|       | school, other institution and public administrative area                                                                    |
| U213. | [X]Intentional self harm by hanging, strangulation and suffocation, occurrence at sports and athletics area                 |
| U214. | [X]Intentional self harm by hanging, strangulation and suffocation, occurrence on street and highway                        |
| U215. | [X]Intentional self harm by hanging, strangulation and suffocation, occurrence at trade and service area                    |
| U216. | [X]Intentional self harm by hanging, strangulation and suffocation, occurrence at industrial and construction area          |
| U217. | [X]Intentional self harm by hanging, strangulation and suffocation, occurrence on farm                                      |
| U21y. | [X]Intentional self harm by hanging, strangulation and suffocation, occurrence at other specified place                     |
| U21z. | [X]Intentional self harm by hanging, strangulation and suffocation, occurrence at unspecified place                         |
| U22.. | [X]Intentional self harm by drowning and submersion                                                                         |
| U220. | [X]Intentional self harm by drowning and submersion, occurrence at home                                                     |
| U221. | [X]Intentional self harm by drowning and submersion, occurrence in residential institution                                  |
| U222. | [X]Intentional self harm by drowning and submersion, occurrence at school, other institution and public administrative area |
| U223. | [X]Intentional self harm by drowning and submersion, occurrence at sports and athletics area                                |
| U224. | [X]Intentional self harm by drowning and submersion, occurrence on street and highway                                       |

|       |                                                                                                                       |
|-------|-----------------------------------------------------------------------------------------------------------------------|
| U225. | [X]Intentional self harm by drowning and submersion, occurrence at trade and service area                             |
| U226. | [X]Intentional self harm by drowning and submersion, occurrence at industrial and construction area                   |
| U227. | [X]Intentional self harm by drowning and submersion, occurrence on farm                                               |
| U22y. | [X]Intentional self harm by drowning and submersion, occurrence at other specified place                              |
| U22z. | [X]Intentional self harm by drowning and submersion, occurrence at unspecified place                                  |
| U23.. | [X]Intentional self harm by handgun discharge                                                                         |
| U230. | [X]Intentional self harm by handgun discharge, occurrence at home                                                     |
| U231. | [X]Intentional self harm by handgun discharge, occurrence in residential institution                                  |
| U232. | [X]Intentional self harm by handgun discharge, occurrence at school, other institution and public administrative area |
| U233. | [X]Intentional self harm by handgun discharge, occurrence at sports and athletics area                                |
| U234. | [X]Intentional self harm by handgun discharge, occurrence on street and highway                                       |
| U235. | [X]Intentional self harm by handgun discharge, occurrence at trade and service area                                   |
| U236. | [X]Intentional self harm by handgun discharge, occurrence at industrial and construction area                         |
| U237. | [X]Intentional self harm by handgun discharge, occurrence on farm                                                     |
| U23y. | [X]Intentional self harm by handgun discharge, occurrence at other specified place                                    |
| U23z. | [X]Intentional self harm by handgun discharge, occurrence at unspecified place                                        |
| U24.. | [X]Intentional self harm by rifle, shotgun and larger firearm discharge                                               |
| U240. | [X]Intentional self harm by rifle, shotgun and larger firearm discharge, occurrence at home                           |



|       |                                                                                                                                                 |
|-------|-------------------------------------------------------------------------------------------------------------------------------------------------|
| U241. | [X]Intentional self harm by rifle, shotgun and larger firearm discharge, occurrence in residential institution                                  |
| U242. | [X]Intentional self harm by rifle, shotgun and larger firearm discharge, occurrence at school, other institution and public administrative area |
| U243. | [X]Intentional self harm by rifle, shotgun and larger firearm discharge, occurrence at sports and athletics area                                |
| U244. | [X]Intentional self harm by rifle, shotgun and larger firearm discharge, occurrence on street and highway                                       |
| U245. | [X]Intentional self harm by rifle, shotgun and larger firearm discharge, occurrence at trade and service area                                   |
| U246. | [X]Intentional self harm by rifle, shotgun and larger firearm discharge, occurrence at industrial and construction area                         |
| U247. | [X]Intentional self harm by rifle, shotgun and larger firearm discharge, occurrence on farm                                                     |
| U24y. | [X]Intentional self harm by rifle, shotgun and larger firearm discharge, occurrence at other specified place                                    |
| U24z. | [X]Intentional self harm by rifle, shotgun and larger firearm discharge, occurrence at unspecified place                                        |
| U25.. | [X]Intentional self harm by other and unspecified firearm discharge                                                                             |
| U250. | [X]Intentional self harm by other and unspecified firearm discharge, occurrence at home                                                         |
| U251. | [X]Intentional self harm by other and unspecified firearm discharge, occurrence in residential institution                                      |
| U252. | [X]Intentional self harm by other and unspecified firearm discharge, occurrence at school, other institution and public administrative area     |

|       |                                                                                                                        |
|-------|------------------------------------------------------------------------------------------------------------------------|
| U253. | [X]Intentional self harm by other and unspecified firearm discharge, occurrence at sports and athletics area           |
| U254. | [X]Intentional self harm by other and unspecified firearm discharge, occurrence on street and highway                  |
| U255. | [X]Intentional self harm by other and unspecified firearm discharge, occurrence at trade and service area              |
| U256. | [X]Intentional self harm by other and unspecified firearm discharge, occurrence at industrial and construction area    |
| U257. | [X]Intentional self harm by other and unspecified firearm discharge, occurrence on farm                                |
| U25y. | [X]Intentional self harm by other and unspecified firearm discharge, occurrence at other specified place               |
| U25z. | [X]Intentional self harm by other and unspecified firearm discharge, occurrence at unspecified place                   |
| U26.. | [X]Intentional self harm by explosive material                                                                         |
| U260. | [X]Intentional self harm by explosive material, occurrence at home                                                     |
| U261. | [X]Intentional self harm by explosive material, occurrence in residential institution                                  |
| U262. | [X]Intentional self harm by explosive material, occurrence at school, other institution and public administrative area |
| U263. | [X]Intentional self harm by explosive material, occurrence at sports and athletics area                                |
| U264. | [X]Intentional self harm by explosive material, occurrence on street and highway                                       |
| U265. | [X]Intentional self harm by explosive material, occurrence at trade and service area                                   |
| U266. | [X]Intentional self harm by explosive material, occurrence at industrial and construction area                         |
| U267. | [X]Intentional self harm by explosive material, occurrence on farm                                                     |

|       |                                                                                                                                        |
|-------|----------------------------------------------------------------------------------------------------------------------------------------|
| U26y. | [X]Intentional self harm by explosive material, occurrence at other specified place                                                    |
| U26z. | [X]Intentional self harm by explosive material, occurrence at unspecified place                                                        |
| U27.. | [X]Intentional self harm by smoke, fire and flames                                                                                     |
| U270. | [X]Intentional self harm by smoke, fire and flames, occurrence at home                                                                 |
| U271. | [X]Intentional self harm by smoke, fire and flames, occurrence in residential institution                                              |
| U272. | [X]Intentional self harm by smoke, fire and flames, occurrence at school, other institution and public administrative area             |
| U273. | [X]Intentional self harm by smoke, fire and flames, occurrence at sports and athletics area                                            |
| U274. | [X]Intentional self harm by smoke, fire and flames, occurrence on street and highway                                                   |
| U275. | [X]Intentional self harm by smoke, fire and flames, occurrence at trade and service area                                               |
| U276. | [X]Intentional self harm by smoke, fire and flames, occurrence at industrial and construction area                                     |
| U277. | [X]Intentional self harm by smoke, fire and flames, occurrence on farm                                                                 |
| U27y. | [X]Intentional self harm by smoke, fire and flames, occurrence at other specified place                                                |
| U27z. | [X]Intentional self harm by smoke, fire and flames, occurrence at unspecified place                                                    |
| U28.. | [X]Intentional self harm by steam, hot vapours and hot objects                                                                         |
| U280. | [X]Intentional self harm by steam, hot vapours and hot objects, occurrence at home                                                     |
| U281. | [X]Intentional self harm by steam, hot vapours and hot objects, occurrence in residential institution                                  |
| U282. | [X]Intentional self harm by steam, hot vapours and hot objects, occurrence at school, other institution and public administrative area |

|       |                                                                                                                  |
|-------|------------------------------------------------------------------------------------------------------------------|
| U283. | [X]Intentional self harm by steam, hot vapours and hot objects, occurrence at sports and athletics area          |
| U284. | [X]Intentional self harm by steam, hot vapours and hot objects, occurrence on street and highway                 |
| U285. | [X]Intentional self harm by steam, hot vapours and hot objects, occurrence at trade and service area             |
| U286. | [X]Intentional self harm by steam, hot vapours and hot objects, occurrence at industrial and construction area   |
| U287. | [X]Intentional self harm by steam, hot vapours and hot objects, occurrence on farm                               |
| U28y. | [X]Intentional self harm by steam, hot vapours and hot objects, occurrence at other specified place              |
| U28z. | [X]Intentional self harm by steam, hot vapours and hot objects, occurrence at unspecified place                  |
| U29.. | [X]Intentional self harm by sharp object                                                                         |
| U290. | [X]Intentional self harm by sharp object, occurrence at home                                                     |
| U291. | [X]Intentional self harm by sharp object, occurrence in residential institution                                  |
| U292. | [X]Intentional self harm by sharp object, occurrence at school, other institution and public administrative area |
| U293. | [X]Intentional self harm by sharp object, occurrence at sports and athletics area                                |
| U294. | [X]Intentional self harm by sharp object, occurrence on street and highway                                       |
| U295. | [X]Intentional self harm by sharp object, occurrence at trade and service area                                   |
| U296. | [X]Intentional self harm by sharp object, occurrence at industrial and construction area                         |
| U297. | [X]Intentional self harm by sharp object, occurrence on farm                                                     |

|       |                                                                                                                               |
|-------|-------------------------------------------------------------------------------------------------------------------------------|
| U29y. | [X]Intentional self harm by sharp object, occurrence at other specified place                                                 |
| U29z. | [X]Intentional self harm by sharp object, occurrence at unspecified place                                                     |
| U2A.. | [X]Intentional self harm by blunt object                                                                                      |
| U2A0. | [X]Intentional self harm by blunt object, occurrence at home                                                                  |
| U2A1. | [X]Intentional self harm by blunt object, occurrence in residential institution                                               |
| U2A2. | [X]Intentional self harm by blunt object, occurrence at school, other institution and public administrative area              |
| U2A3. | [X]Intentional self harm by blunt object, occurrence at sports and athletics area                                             |
| U2A4. | [X]Intentional self harm by blunt object, occurrence on street and highway                                                    |
| U2A5. | [X]Intentional self harm by blunt object, occurrence at trade and service area                                                |
| U2A6. | [X]Intentional self harm by blunt object, occurrence at industrial and construction area                                      |
| U2A7. | [X]Intentional self harm by blunt object, occurrence on farm                                                                  |
| U2Ay. | [X]Intentional self harm by blunt object, occurrence at other specified place                                                 |
| U2Az. | [X]Intentional self harm by blunt object, occurrence at unspecified place                                                     |
| U2B.. | [X]Intentional self harm by jumping from a high place                                                                         |
| U2B0. | [X]Intentional self harm by jumping from a high place, occurrence at home                                                     |
| U2B1. | [X]Intentional self harm by jumping from a high place, occurrence in residential institution                                  |
| U2B2. | [X]Intentional self harm by jumping from a high place, occurrence at school, other institution and public administrative area |
| U2B3. | [X]Intentional self harm by jumping from a high place, occurrence at sports and athletics area                                |

|       |                                                                                                                                           |
|-------|-------------------------------------------------------------------------------------------------------------------------------------------|
| U2B4. | [X]Intentional self harm by jumping from a high place, occurrence on street and highway                                                   |
| U2B5. | [X]Intentional self harm by jumping from a high place, occurrence at trade and service area                                               |
| U2B6. | [X]Intentional self harm by jumping from a high place, occurrence at industrial and construction area                                     |
| U2B7. | [X]Intentional self harm by jumping from a high place, occurrence on farm                                                                 |
| U2By. | [X]Intentional self harm by jumping from a high place, occurrence at other specified place                                                |
| U2Bz. | [X]Intentional self harm by jumping from a high place, occurrence at unspecified place                                                    |
| U2C.. | [X]Intentional self harm by jumping or lying before moving object                                                                         |
| U2C0. | [X]Intentional self harm by jumping or lying before moving object, occurrence at home                                                     |
| U2C1. | [X]Intentional self harm by jumping or lying before moving object, occurrence in residential institution                                  |
| U2C2. | [X]Intentional self harm by jumping or lying before moving object, occurrence at school, other institution and public administrative area |
| U2C3. | [X]Intentional self harm by jumping or lying before moving object, occurrence at sports and athletics area                                |
| U2C4. | [X]Intentional self harm by jumping or lying before moving object, occurrence on street and highway                                       |
| U2C5. | [X]Intentional self harm by jumping or lying before moving object, occurrence at trade and service area                                   |
| U2C6. | [X]Intentional self harm by jumping or lying before moving object, occurrence at industrial and construction area                         |
| U2C7. | [X]Intentional self harm by jumping or lying before moving object, occurrence on farm                                                     |

|       |                                                                                                                               |
|-------|-------------------------------------------------------------------------------------------------------------------------------|
| U2Cy. | [X]Intentional self harm by jumping or lying before moving object, occurrence at other specified place                        |
| U2Cz. | [X]Intentional self harm by jumping or lying before moving object, occurrence at unspecified place                            |
| U2D.. | [X]Intentional self harm by crashing of motor vehicle                                                                         |
| U2D0. | [X]Intentional self harm by crashing of motor vehicle, occurrence at home                                                     |
| U2D1. | [X]Intentional self harm by crashing of motor vehicle, occurrence in residential institution                                  |
| U2D2. | [X]Intentional self harm by crashing of motor vehicle, occurrence at school, other institution and public administrative area |
| U2D3. | [X]Intentional self harm by crashing of motor vehicle, occurrence at sports and athletics area                                |
| U2D4. | [X]Intentional self harm by crashing of motor vehicle, occurrence on street and highway                                       |
| U2D5. | [X]Intentional self harm by crashing of motor vehicle, occurrence at trade and service area                                   |
| U2D6. | [X]Intentional self harm by crashing of motor vehicle, occurrence at industrial and construction area                         |
| U2D7. | [X]Intentional self harm by crashing of motor vehicle, occurrence on farm                                                     |
| U2Dy. | [X]Intentional self harm by crashing of motor vehicle, occurrence at other specified place                                    |
| U2Dz. | [X]Intentional self harm by crashing of motor vehicle, occurrence at unspecified place                                        |
| U2E.. | [X]Self mutilation                                                                                                            |
| U2y.. | [X]Intentional self harm by other specified means                                                                             |
| U2y0. | [X]Intentional self harm by other specified means, occurrence at home                                                         |
| U2y1. | [X]Intentional self harm by other specified means, occurrence in residential institution                                      |

|       |                                                                                                                           |
|-------|---------------------------------------------------------------------------------------------------------------------------|
| U2y2. | [X]Intentional self harm by other specified means, occurrence at school, other institution and public administrative area |
| U2y3. | [X]Intentional self harm by other specified means, occurrence at sports and athletics area                                |
| U2y4. | [X]Intentional self harm by other specified means, occurrence on street and highway                                       |
| U2y5. | [X]Intentional self harm by other specified means, occurrence at trade and service area                                   |
| U2y6. | [X]Intentional self harm by other specified means, occurrence at industrial and construction area                         |
| U2y7. | [X]Intentional self harm by other specified means, occurrence on farm                                                     |
| U2yy. | [X]Intentional self harm by other specified means, occurrence at other specified place                                    |
| U2yz. | [X]Intentional self harm by other specified means, occurrence at unspecified place                                        |
| U2z.. | [X]Intentional self harm by unspecified means                                                                             |
| U2z0. | [X]Intentional self harm by unspecified means, occurrence at home                                                         |
| U2z1. | [X]Intentional self harm by unspecified means, occurrence in residential institution                                      |
| U2z2. | [X]Intentional self harm by unspecified means, occurrence at school, other institution and public administrative area     |
| U2z3. | [X]Intentional self harm by unspecified means, occurrence at sports and athletics area                                    |
| U2z4. | [X]Intentional self harm by unspecified means, occurrence on street and highway                                           |
| U2z5. | [X]Intentional self harm by unspecified means, occurrence at trade and service area                                       |
| U2z6. | [X]Intentional self harm by unspecified means, occurrence at industrial and construction area                             |
| U2z7. | [X]Intentional self harm by unspecified means, occurrence on farm                                                         |
| U2zy. | [X]Intentional self harm by unspecified means, occurrence at other specified place                                        |



|         |                                                                                |
|---------|--------------------------------------------------------------------------------|
| U2zz.   | [X]Intentional self harm by unspecified means, occurrence at unspecified place |
| U41..   | [X]Hanging strangulation + suffocation undetermined intent                     |
| U44..   | [X]Rifle shotgun+larger firearm discharge undetermin intent                    |
| U45..   | [X]Other+unspecified firearm discharge undetermined intent                     |
| U4B..   | [X]Falling jumping/pushed from high place undeterm intent                      |
| U4Bz.   | [X]Fall jump/push frm high plce undt intnt occ unspecif plce                   |
| U72..   | [X]Sequel intentn self-harm assault+event of undeterm intent                   |
| U720.   | [X]Sequelae of intentional self-harm                                           |
| ZRLfC12 | Health of the Nation Outcome Scales item 2 – nonaccidental self-injury         |
| ZX...   | Self-harm                                                                      |
| ZX1..   | Self-injurious behaviour                                                       |
| ZX11.   | Biting self                                                                    |
| ZX12.   | Burning self                                                                   |
| ZX13.   | Cutting self                                                                   |
| ZX15.   | Drowning self                                                                  |
| ZX18.   | Hanging self                                                                   |
| ZX19.   | Hitting self                                                                   |
| ZX191   | Punching self                                                                  |
| ZX192   | Slapping self                                                                  |
| ZX1B.   | Jumping from height                                                            |
| ZX1B1   | Jumping from building                                                          |
| ZX1B2   | Jumping from bridge                                                            |
| ZX1B3   | Jumping from cliff                                                             |
| ZX1C.   | Nipping self                                                                   |
| ZX1E.   | Pinching self                                                                  |

|       |                                   |
|-------|-----------------------------------|
| ZX1G. | Scratches self                    |
| ZX1H. | Self-asphyxiation                 |
| ZX1H1 | Self-strangulation                |
| ZX1H2 | Self-suffocation                  |
| ZX1I. | Self-scalding                     |
| ZX1J. | Self-electrocution                |
| ZX1K. | Self-incineration                 |
| ZX1L. | Self-mutilation                   |
| ZX1L1 | Self-mutilation of hands          |
| ZX1L2 | Self-mutilation of genitalia      |
| ZX1L3 | Self-mutilation of penis          |
| ZX1L6 | Self-mutilation of ears           |
| ZX1LD | [X]Self mutilation                |
| ZX1M. | Shooting self                     |
| ZX1N. | Stabbing self                     |
| ZX1Q. | Throwing self in front of train   |
| ZX1R. | Throwing self in front of vehicle |
| ZX1S. | Throwing self onto floor          |
