# Supplementary material for: Self-harm presentation across healthcare settings by sex in young people: an e-cohort study using routinely collected linked healthcare data in Wales, UK
Source: PubMed Central journal article supplement (PMC7146921; doi:10.1136/archdischild-2019-317248), 2019-10-14
Supplement: archdischild-2019-317248supp005.pdf [file archdischild-2019-317248supp005.pdf]

**Appendix D****Categorisation of Admission Specialties****Surgical Specialties**

- 100 General Surgery
- 101 Urology
- 102 Transplantation Surgery
- 103 Breast Surgery
- 104 Colorectal Surgery
- 105 Hepatobiliary & Pancreatic Surgery
- 106 Upper Gastrointestinal Surgery
- 107 Vascular Surgery
- 108 Spinal Surgery Service
- 110 Trauma & Orthopaedics
- 120 ENT
- 130 Ophthalmology
- 140 Oral Surgery
- 141 Restorative Dentistry
- 142 Paediatric Dentistry
- 143 Orthodontics
- 144 Maxillo-Facial Surgery
- 150 Neurosurgery
- 160 Plastic Surgery
- 161 Burns Care
- 170 Cardiothoracic Surgery
- 172 Cardiac Surgery
- 173 Thoracic Surgery
- 174 Cardiothoracic Transplantation
- 191 Pain Management
- 199 Non-UK provider; specialty function not know, treatment mainly surgical (only applicable for overseas providers)

**Accident and Emergency Surgical Specialty**

180 Accident & Emergency

**Paediatrics**

211 Paediatric Urology

212 Paediatric Transplantation Surgery

213 Paediatric Gastrointestinal Surgery

214 Paediatric Trauma And Orthopaedics

215 Paediatric Ear Nose And Throat

216 Paediatric Ophthalmology

217 Paediatric Maxillo-Facial Surgery

218 Paediatric Neurosurgery

219 Paediatric Plastic Surgery

220 Paediatric Burns Care

221 Paediatric Cardiac Surgery

222 Paediatric Thoracic Surgery

223 Paediatric Epilepsy

241 Paediatric Pain Management

242 Paediatric Intensive Care

251 Paediatric Gastroenterology

252 Paediatric Endocrinology

253 Paediatric Clinical Haematology

254 Paediatric Audiological Medicine

255 Paediatric Clinical Immunology And Allergy Service

256 Paediatric Infectious Diseases

257 Paediatric Dermatology

258 Paediatric Respiratory Medicine

259 Paediatric Nephrology

260 Paediatric Medical Oncology

261 Paediatric Metabolic Disease

262 Paediatric Rheumatology

263 Paediatric Diabetic Medicine

264 Paediatric Cystic Fibrosis

280 Paediatric Interventional Radiology

290 Community Paediatrics

291 Paediatric Neuro-Disability

171 Paediatric Surgery

321 Paediatric Cardiology

420 Paediatrics

421 Paediatric Neurology

### **Psychiatry**

700 Learning Disability

710 Adult Mental Illness

711 Child & Adolescent Psychiatry

712 Forensic Psychiatry

713 Psychotherapy

715 Old Age Psychiatry

720 Eating Disorders

721 Addiction Services

722 Liaison Psychiatry

723 Psychiatric Intensive Care

724 Perinatal Psychiatry

725 Mental Health Recovery And Rehabilitation Service

726 Mental Health Dual Diagnosis Service

727 Dementia Assessment Service

656 Clinical Psychology

### **General Medicine**

300 General Medicine

### **Other Medical Specialities**

190 Anaesthetics

192 Critical Care Medicine

301 Gastroenterology

302 Endocrinology

303 Clinical Haematology

- 304 Clinical Physiology
- 305 Clinical Pharmacology
- 306 Hepatology
- 307 Diabetic Medicine
- 308 Blood And Marrow Transplantation
- 309 Haemophilia Service
- 310 Audiological Medicine
- 311 Clinical Genetics
- 312 Clinical Cytogenetics and Molecular Genetics
- 313 Clinical Immunology and Allergy
- 314 Rehabilitation Service
- 315 Palliative Medicine
- 316 Clinical Immunology
- 317 Allergy Service
- 318 Intermediate Care
- 319 Respite Care
- 320 Cardiology
- 322 Clinical Microbiology
- 323 Spinal Injuries
- 324 Anticoagulant Service
- 325 Sport And Exercise Medicine
- 327 Cardiac Rehabilitation
- 328 Stroke Medicine
- 329 Transient Ischaemic Attack
- 330 Dermatology
- 331 Congenital Heart Disease Service
- 340 Respiratory Medicine
- 341 Respiratory Physiology
- 342 Programmed Pulmonary Rehabilitation
- 343 Adult Cystic Fibrosis Service
- 344 Complex Specialised Rehabilitation Service

- 345 Specialist Rehabilitation Service
- 346 Local Specialist Rehabilitation Service
- 350 Infectious Diseases
- 352 Tropical Medicine
- 360 Genitourinary Medicine
- 361 Nephrology
- 370 Medical Oncology
- 371 Nuclear Medicine
- 400 Neurology
- 401 Clinical Neurophysiology
- 410 Rheumatology
- 422 Neonatology
- 424 Well Babies
- 430 Geriatric Medicine
- 450 Dental Medicine Specialties
- 460 Medical Ophthalmology
- 499 Non-UK provider; specialty function not known, treatment mainly medical (only applicable for overseas providers)
- 501 Obstetrics
- 502 Gynaecology
- 503 Gynaecological Oncology
- 510 Obstetrics – AN (outpatients)
- 520 Obstetrics - PN (outpatients)
- 560 Midwifery Service
- 610 GP Maternity
- 620 GP Other
- 650 Physiotherapy
- 651 Occupational Therapy
- 652 Speech And Language Therapy
- 653 Podiatry
- 654 Dietetics

- 655 Orthoptics
- 657 Prosthetics
- 658 Orthotics
- 659 Drama Therapy
- 660 Art Therapy
- 661 Music Therapy
- 662 Optometry
- 663 Podiatric Surgery
- 800 Clinical Oncology (previously Radiotherapy)
- 810 Radiology
- 811 Interventional Radiology
- 812 Diagnostic Imaging
- 820 General Pathology
- 821 Blood Transfusion
- 822 Chemical Pathology
- 823 Haematology (non-clinical)
- 824 Histopathology
- 830 Immunopathology
- 831 Medical Microbiology
- 832 Neuropathology
- 834 Medical Virology
- 840 Audiology
- 900 Community Medicine
- 901 Occupational Medicine
- 920 Diabetic Education Service
- 950 Nursing
- 990 Joint Consultant Clinics
- 998 Diagnostic\*
- 999 Allied Health Professional (AHP) Services\*
