# Supplementary material for: Self-harm presentation across healthcare settings by sex in young people: an e-cohort study using routinely collected linked healthcare data in Wales, UK
Source: PubMed Central journal article supplement (PMC7146921; doi:10.1136/archdischild-2019-317248), 2019-10-14
Supplement: archdischild-2019-317248supp006.pdf [file archdischild-2019-317248supp006.pdf]

**Supplementary Tables****Supplementary Table 1 Cohort Demographics**

|             | %(95% CI; n)                 | Average age at onset<br>of follow-up(SD) | Average person years<br>follow-up(SD) |
|-------------|------------------------------|------------------------------------------|---------------------------------------|
| Males       | 50.4(50.3-50.6;<br>n=472923) | 14(4.9)                                  | 6.0(3.8)                              |
| Females     | 49.7(49.5-49.8;<br>n=465774) | 15(4.9)                                  | 5.9(3.8)                              |
| <b>All</b>  |                              | <b>15(4.9)</b>                           | <b>5.9(.8)</b>                        |
|             |                              | <b>%(95CI; n)</b>                        |                                       |
| Deprivation | (least deprived)             | 20.4(20.3-20.5; 191578)                  |                                       |
|             | 4                            | 17.8(17.8-17.9; 167291)                  |                                       |
|             | 3                            | 17.6(17.5-17.7; 164850)                  |                                       |
|             | 2                            | 16.9(16.8-17; 158470)                    |                                       |
|             | (Most deprived)              | 20.5(20.4-20.6; 192448)                  |                                       |
|             | Unknown                      | 6.7(6.7-6.8; 63060)                      |                                       |

**Supplementary Table 2 n; incidence per 1000 PYAR(95% CI) and IRRs (95%CI) of incident presentations for self-harm by age group and service in females**

|      | 10-14 years              |                  |                          |                  |                          |                  | 15-19 years         |     |                            |                  |                     |     | 20-24 years              |                  |                     |     |                          |                  |                          |                    |                          |                   |
|------|--------------------------|------------------|--------------------------|------------------|--------------------------|------------------|---------------------|-----|----------------------------|------------------|---------------------|-----|--------------------------|------------------|---------------------|-----|--------------------------|------------------|--------------------------|--------------------|--------------------------|-------------------|
|      | GP                       |                  | ED attendances           |                  | Hospital admissions      |                  | GP                  |     | ED attendances             |                  | Hospital admissions |     | GP                       |                  | ED attendances      |     | Hospital admissions      |                  |                          |                    |                          |                   |
|      | n; inc <sup>a</sup>      | IRR              | n; inc <sup>a</sup>      | IRR              | n; inc <sup>a</sup>      | IRR              | n; inc <sup>a</sup> | IRR | n; inc <sup>a</sup>        | IRR              | n; inc <sup>a</sup> | IRR | n; inc <sup>a</sup>      | IRR              | n; inc <sup>a</sup> | IRR | n                        | IRR              |                          |                    |                          |                   |
| 2003 | 285;<br>4(3.6-<br>4.5)   | Ref <sup>b</sup> |                          |                  | 125;<br>1.8(1.5-<br>2.1) | Ref <sup>b</sup> |                     |     | 562;<br>8.9(8.2-<br>9.7)   |                  |                     |     | 272;<br>4.3(3.8-<br>4.9) | Ref <sup>b</sup> |                     |     | 288;<br>5.3(4.7-<br>5.9) | Ref <sup>b</sup> | 153;<br>2.8(2.4-<br>3.3) | Ref <sup>b</sup>   |                          |                   |
| 2004 | 277;<br>3.7(3.3-<br>4.2) | 0.9(0.8-<br>1.1) |                          |                  | 134;<br>1.8(1.5-<br>2.1) | 1.0(0.9-<br>1.2) |                     |     | 635;<br>9.2(8.5-<br>10.0)  | 1.0(1.0-<br>1.1) |                     |     | 298;<br>4.3(3.9-<br>4.9) | 1.0(0.9-<br>1.1) |                     |     | 349;<br>5.5(4.9-<br>6.1) | 1.0(0.9-<br>1.2) | 156;<br>2.5(2.1-<br>2.9) | 0.8(0.9-<br>-1.0)  |                          |                   |
| 2005 | 294;<br>3.9(3.5-<br>4.4) | 1.0(0.8-<br>1.3) |                          |                  | 182;<br>2.4(2.1-<br>2.8) | 1.4(1.1-<br>1.7) |                     |     | 648;<br>9.2(8.5-<br>9.9)   | 1.0(1.0-<br>1.1) |                     |     | 353;<br>5(4.5-<br>5.5)   | 1.2(1.0-<br>1.3) |                     |     | 376;<br>5.7(5.1-<br>6.3) | 1.1(1.0-<br>1.2) | 184;<br>2.8(2.4-<br>3.2) | 1.0(0.8-<br>-1.3)  |                          |                   |
| 2006 | 292;<br>3.9(3.5-<br>4.4) | 1.0(0.8-<br>1.1) |                          |                  | 202;<br>2.7(2.4-<br>3.1) | 1.6(1.3-<br>1.8) |                     |     | 645;<br>8.9(8.3-<br>9.7)   | 1.0(0.9-<br>1.1) |                     |     | 361;<br>5(4.5-<br>5.5)   | 1.2(1.0-<br>1.3) |                     |     | 374;<br>5.6(5.0-<br>6.1) | 1.0(0.9-<br>1.2) | 215;<br>3.2(2.8-<br>3.6) | 1.1(1.0-<br>-1.3)  |                          |                   |
| 2007 | 275;<br>3.7(3.3-<br>4.2) | 0.9(0.8-<br>1.1) |                          |                  | 189;<br>2.6(2.2-<br>3.0) | 1.5(1.3-<br>1.6) |                     |     | 752;<br>10.3(9.1-<br>11.1) | 1.2(1.1-<br>1.2) |                     |     | 433;<br>5.9(5.4-<br>6.5) | 1.4(1.2-<br>1.5) |                     |     | 436;<br>6.4(5.8-<br>7.0) | 1.2(1.1-<br>1.3) | 221;<br>3.2(2.8-<br>3.7) | 1.2(1.0-<br>-1.4)  |                          |                   |
| 2008 | 273;<br>3.8(3.3-<br>4.2) | 0.9(0.8-<br>1.1) |                          |                  | 159;<br>2.2(1.9-<br>2.6) | 1.3(1.1-<br>1.5) |                     |     | 731;<br>10(9.3-<br>10.8)   | 1.1(1.0-<br>1.2) |                     |     | 401;<br>5.5(5.0-<br>6.1) | 1.3(1.1-<br>1.5) |                     |     | 454;<br>6.6(6.0-<br>7.2) | 1.2(1.1-<br>1.4) | 246;<br>3.6(3.1-<br>4.0) | 1.3(1.1-<br>-1.4)  |                          |                   |
| 2009 | 246;<br>3.4(3.0-<br>3.9) | 0.9(0.7-<br>1.0) |                          |                  | 169;<br>2.4(2.0-<br>2.7) | 1.3(1.2-<br>1.5) |                     |     | 605;<br>8.4(7.7-<br>9.1)   | 1.0(0.9-<br>1.0) |                     |     | 333;<br>4.6(4.1-<br>5.2) | 1.1(1.0-<br>1.2) |                     |     | 397;<br>5.8(5.2-<br>6.3) | 1.1(1.0-<br>1.2) | 187;<br>2.7(2.3-<br>3.1) | 1.0(0.8-<br>1-1.2) |                          |                   |
| 2010 | 246;<br>3.5(3.1-<br>4.0) | 0.9(0.7-<br>1.0) |                          |                  | 156;<br>2.2(1.9-<br>2.6) | 1.3(1.1-<br>1.5) |                     |     | 622;<br>8.8(8.2-<br>9.6)   | 1.0(0.9-<br>1.0) |                     |     | 313;<br>4.4(4-5)         | 1.0(0.9-<br>1.1) |                     |     | 389;<br>5.7(5.1-<br>6.3) | 1.1(1.0-<br>1.2) | 189;<br>2.8(2.4-<br>3.2) | 1.0(0.8-<br>-1.3)  |                          |                   |
| 2011 | 243;<br>3.5(3.1-<br>4.0) | 0.9(0.8-<br>1.0) | 133;<br>1.9(1.6-<br>2.3) | Ref <sup>b</sup> | 158;<br>2.3(1.9-<br>2.7) | 1.3(1.1-<br>1.5) |                     |     | 601;<br>8.8(8.1-<br>9.5)   | 1.0(0.9-<br>1.1) |                     |     | 339;<br>4.9(4.4-<br>5.5) | 1.1(1.0-<br>1.3) |                     |     | 361;<br>5.3(4.8-<br>5.9) | 1.0(0.9-<br>1.1) | 243;<br>3.6(3.1-<br>4.1) | Ref <sup>b</sup>   |                          |                   |
| 2012 | 337;<br>5.0(4.5-<br>5.5) | 1.2(1.0-<br>1.5) | 160;<br>2.4(2.0-<br>2.7) | 1.3(0.9-<br>1.7) | 224;<br>3.3(2.9-<br>3.7) | 1.9(1.6-<br>2.3) |                     |     | 559;<br>8.3(7.6-<br>9.0)   | 0.9(0.8-<br>1.0) |                     |     | 410;<br>6.1(5.5-<br>6.7) | 1.0(0.9-<br>1.1) |                     |     | 301;<br>4.5(4.0-<br>5.0) | 1.0(0.9-<br>1.2) | 372;<br>5.5(5.0-<br>6.0) | 1.0(1.0-<br>1.1)   |                          |                   |
|      |                          |                  |                          |                  |                          |                  |                     |     |                            |                  |                     |     |                          |                  |                     |     |                          |                  | 283;<br>4.2(3.7-<br>4.7) | 1.2(1.0-<br>1.3)   | 178;<br>2.6(2.3-<br>2.9) | 0.9(0.8-<br>-1.1) |

|      |                          |                  |                          |                  |                          |                  |                           |                  |                          |                  |                          |                  |                          |                  |                          |                  |                          |                  |
|------|--------------------------|------------------|--------------------------|------------------|--------------------------|------------------|---------------------------|------------------|--------------------------|------------------|--------------------------|------------------|--------------------------|------------------|--------------------------|------------------|--------------------------|------------------|
|      | 5.5)                     |                  | 2.8)                     |                  | 3.8)                     |                  | 9.0)                      |                  | 6.7)                     |                  | 5.0)                     |                  | 6.1)                     |                  | 4.7)                     |                  | 3.1)                     |                  |
| 2013 | 424;<br>6.4(5.8-<br>7.1) | 1.6(1.4-<br>1.9) | 192;<br>2.8(2.5-<br>3.4) | 1.5(1.2-<br>2.0) | 296;<br>4.5(4.0-<br>5.0) | 2.5(2.2-<br>2.9) | 591;<br>8.9(8.2-<br>9.7)  | 1.0(0.9-<br>1.1) | 446;<br>6.7(6.1-<br>7.4) | 1.1(1.0-<br>1.3) | 356;<br>5.4(4.8-<br>6.0) | 1.3(1.1-<br>1.4) | 326;<br>4.9(4.4-<br>5.5) | 0.9(0.8-<br>1.1) | 276;<br>4.2(3.7-<br>4.7) | 1.2(1.1-<br>1.2) | 187;<br>2.8(2.4-<br>3.3) | 1.0(0.8<br>-1.2) |
| 2014 | 353;<br>5.4(4.9-<br>6.0) | 1.3(1.2-<br>1.6) | 181;<br>2.8(2.4-<br>3.2) | 1.5(1.1-<br>1.9) | 257;<br>3.9(3.5-<br>4.5) | 2.3(2.0-<br>2.6) | 538;<br>8.3(7.6-<br>9.0)  | 0.9(0.8-<br>1.1) | 417;<br>6.4(5.8-<br>7.1) | 1.1(1.0-<br>1.2) | 358;<br>5.5(4.9-<br>6.1) | 1.3(1.1-<br>1.5) | 282;<br>4.3(3.8-<br>4.9) | 0.8(0.7-<br>0.9) | 269;<br>4.1(3.6-<br>4.6) | 1.2(1.0-<br>1.3) | 183;<br>2.8(2.4-<br>3.2) | 1.0(0.8<br>-1.2) |
| 2015 | 228;<br>5(4.4-<br>5.7)   | 1.2(1.1-<br>1.4) | 155;<br>3.4(2.9-<br>4.0) | 1.8(1.4-<br>2.3) | 208;<br>4.5(3.9-<br>5.2) | 2.6(2.2-<br>3.0) | 462;<br>9.8(8.9-<br>10.7) | 1.1(1.0-<br>1.2) | 364;<br>7.7(6.9-<br>8.5) | 1.3(1.2-<br>1.4) | 305;<br>6.5(5.8-<br>7.2) | 1.5(1.4-<br>1.7) | 217;<br>4.4(3.9-<br>5.1) | 0.8(0.7-<br>0.9) | 221;<br>4.5(3.9-<br>5.2) | 1.3(1.2-<br>1.4) | 119;<br>2.4(2.0-<br>2.9) | 0.9(0.6<br>-1.2) |

a. Incidence per 1000 PYAR

b. Reference year

**Supplementary Table 3 n; incidence per 1000 PYAR(95% CI) and IRRs (95%CI) of incident presentations for self-harm by age group and service in males**

|      | 10-14 years             |                  |                     |     | 15-19 years             |                  |                     |     | 20-24 years              |                  |                     |     |                          |                  |                     |     |                          |                  |                          |                  |
|------|-------------------------|------------------|---------------------|-----|-------------------------|------------------|---------------------|-----|--------------------------|------------------|---------------------|-----|--------------------------|------------------|---------------------|-----|--------------------------|------------------|--------------------------|------------------|
|      | GP                      |                  | ED attendances      |     | Hospital admissions     |                  | GP                  |     | ED attendances           |                  | Hospital admissions |     | GP                       |                  | ED attendances      |     | Hospital admissions      |                  |                          |                  |
|      | n; inc <sup>a</sup>     | IRR              | n; inc <sup>a</sup> | IRR | n; inc <sup>a</sup>     | IRR              | n; inc <sup>a</sup> | IRR | n; inc <sup>a</sup>      | IRR              | n; inc <sup>a</sup> | IRR | n; inc <sup>a</sup>      | IRR              | n; inc <sup>a</sup> | IRR | n                        | IRR              |                          |                  |
| 2003 | 83;<br>1.1(0.9-<br>1.4) | Ref <sup>b</sup> |                     |     | 30;<br>0.4(0.3-<br>0.6) | Ref <sup>b</sup> |                     |     | 285;<br>4.3(3.8-<br>4.9) | Ref <sup>b</sup> |                     |     | 144;<br>2.2(1.8-<br>2.6) | Ref <sup>b</sup> |                     |     | 248;<br>4.3(3.8-<br>4.8) | Ref <sup>b</sup> | 122;<br>2.1(1.7-<br>2.5) | Ref <sup>b</sup> |
| 2004 | 75;<br>1(0.8-<br>1.2)   | 0.9(0.7-<br>1.2) |                     |     | 45;<br>0.6(0.4-<br>0.8) | 1.5(1.0-<br>2.0) |                     |     | 296;<br>4.1(3.7-<br>4.6) | 1.0(0.9-<br>1.1) |                     |     | 159;<br>2.2(1.9-<br>2.6) | 1.0(0.9-<br>1.2) |                     |     | 312;<br>4.7(4.2-<br>5.3) | 1.1(0.8-<br>1.5) | 162;<br>2.5(2.1-<br>2.9) | 1.2(0.9<br>-1.6) |
| 2005 | 81;<br>1(0.8-<br>1.3)   | 0.9(0.7-<br>1.2) |                     |     | 43;<br>0.6(0.4-<br>0.7) | 1.4(1.0-<br>2.0) |                     |     | 319;<br>4.3(3.9-<br>4.8) | 1.0(0.9-<br>1.1) |                     |     | 168;<br>2.3(1.9-<br>2.6) | 1.0(0.9-<br>1.2) |                     |     | 304;<br>4.5(4-<br>5)     | 1.1(0.8-<br>1.4) | 144;<br>2.1(1.8-<br>2.5) | 1.0(0.8<br>-1.4) |
| 2006 | 72;<br>0.9(0.7-<br>1.2) | 0.8(0.7-<br>1.0) |                     |     | 36;<br>0.5(0.3-<br>0.6) | 1.2(0.9-<br>1.5) |                     |     | 342;<br>4.5(4.1-<br>5)   | 1.1(1.0-<br>1.2) |                     |     | 194;<br>2.6(2.2-<br>3)   | 1.2(1.0-<br>1.3) |                     |     | 293;<br>4.2(3.7-<br>4.7) | 1.0(0.8-<br>1.3) | 164;<br>2.4(2-<br>2.8)   | 1.2(0.9<br>-1.5) |
| 2007 | 64;<br>0.8(0.6-<br>1.1) | 0.7(0.6-<br>0.9) |                     |     | 37;<br>0.5(0.3-<br>0.7) | 1.2(0.8-<br>1.8) |                     |     | 351;<br>4.6(4.1-<br>5.1) | 1.1(0.9-<br>1.2) |                     |     | 215;<br>2.8(2.5-<br>3.2) | 1.2(1.1-<br>1.4) |                     |     | 334;<br>4.7(4.2-<br>5.2) | 1.1(0.9-<br>1.4) | 204;<br>2.9(2.5-<br>3.3) | 1.4(1.1<br>-1.8) |

|      |                         |                  |                         |                         |                         |                          |                          |                  |                          |                  |                          |                  |                          |                          |                          |                  |                          |                   |
|------|-------------------------|------------------|-------------------------|-------------------------|-------------------------|--------------------------|--------------------------|------------------|--------------------------|------------------|--------------------------|------------------|--------------------------|--------------------------|--------------------------|------------------|--------------------------|-------------------|
| 2008 | 71;<br>0.9(0.7-<br>1.2) | 0.8(0.6-<br>1.1) |                         | 36;<br>0.5(0.3-<br>0.7) | 1.2(0.9-<br>1.6)        | 327;<br>4.3(3.8-<br>4.8) | 1.0(0.8-<br>1.1)         |                  | 196;<br>2.6(2.2-<br>3)   | 1.1(0.9-<br>1.4) | 385;<br>5.3(4.8-<br>5.9) | 1.3(1.0-<br>1.6) |                          | 184;<br>2.6(2.2-<br>2.9) | 1.2(1.0-<br>-1.6)        |                  |                          |                   |
| 2009 | 62;<br>0.8(0.6-<br>1.1) | 0.7(0.6-<br>1.0) |                         | 33;<br>0.4(0.3-<br>0.6) | 1.1(0.7-<br>1.6)        | 300;<br>4(3.5-<br>4.5)   | 0.9(0.8-<br>1.1)         |                  | 149;<br>2(1.7-<br>2.3)   | 0.9(0.8-<br>1.0) | 324;<br>4.4(4-<br>4.9)   | 1.0(0.8-<br>1.4) |                          | 188;<br>2.6(2.2-<br>3)   | 1.3(1.0-<br>-1.6)        |                  |                          |                   |
| 2010 | 58;<br>0.8(0.6-<br>1)   | 0.7(0.6-<br>0.9) |                         | 33;<br>0.4(0.3-<br>0.6) | 1.1(0.9-<br>1.4)        | 372;<br>5(4.5-<br>5.6)   | 1.2(1.0-<br>1.3)         |                  | 160;<br>2.2(1.8-<br>2.5) | 1.0(0.8-<br>1.2) | 301;<br>4.1(3.7-<br>4.6) | 1.0(0.7-<br>1.3) |                          | 156;<br>2.1(1.8-<br>2.5) | 1.0(0.8-<br>-1.3)        |                  |                          |                   |
| 2011 | 55;<br>0.8(0.6-<br>1)   | 0.7(0.5-<br>1.0) | 45;<br>0.6(0.4-<br>0.8) | Ref <sup>b</sup>        | 30;<br>0.4(0.3-<br>0.6) | 1.1(0.7-<br>1.6)         | 266;<br>3.7(3.2-<br>4.1) | 0.8(0.8-<br>0.9) | 299;<br>4.1(3.7-<br>4.6) | Ref <sup>b</sup> | 167;<br>2.3(2-<br>2.7)   | 1.0(0.9-<br>1.2) | 329;<br>4.5(4-<br>5)     | 1.1(0.8-<br>1.4)         | 313;<br>4.3(3.8-<br>4.8) | Ref <sup>b</sup> | 165;<br>2.3(1.9-<br>2.6) | 1.1(0.8-<br>-1.4) |
| 2012 | 49;<br>0.7(0.5-<br>0.9) | 0.6(0.4-<br>.9)  | 63;<br>0.9(0.7-<br>1.1) | 1.4(1.1-<br>1.9)        | 35;<br>0.5(0.3-<br>0.7) | 1.3(0.9-<br>1.7)         | 281;<br>3.9(3.5-<br>4.4) | 0.9(0.8-<br>1.0) | 365;<br>5.1(4.6-<br>5.6) | 1.2(1.1-<br>1.4) | 148;<br>2.1(1.7-<br>2.4) | 0.9(0.9-<br>1.0) | 289;<br>4(3.5-<br>4.4)   | 0.9(0.7-<br>1.3)         | 350;<br>4.8(4.3-<br>5.3) | 1.1(1.0-<br>1.2) | 166;<br>2.3(1.9-<br>2.7) | 1.1(0.9-<br>-1.5) |
| 2013 | 69;<br>1(0.8-<br>1.3)   | 0.9(0.7-<br>1.2) | 78;<br>1.1(0.9-<br>1.4) | 1.8(1.5-<br>2.1)        | 49;<br>0.7(0.5-<br>0.9) | 1.8(1.2-<br>2.6)         | 263;<br>3.7(3.3-<br>4.2) | 0.9(0.8-<br>1.0) | 307;<br>4.4(3.9-<br>4.9) | 1.1(0.9-<br>1.2) | 154;<br>2.2(1.9-<br>2.6) | 1.0(0.9-<br>1.1) | 266;<br>3.7(3.3-<br>4.2) | 0.9(0.7-<br>1.2)         | 313;<br>4.4(3.9-<br>4.9) | 1.0(0.9-<br>1.2) | 163;<br>2.3(1.9-<br>2.7) | 1.1(0.8-<br>-1.4) |
| 2014 | 62;<br>0.9(0.7-<br>1.2) | 0.8(0.6-<br>1.0) | 69;<br>1(0.8-<br>1.3)   | 1.6(1.2-<br>2.3)        | 39;<br>0.6(0.4-<br>0.8) | 1.4(1.0-<br>2.0)         | 227;<br>3.3(2.9-<br>3.8) | 0.8(0.6-<br>1.0) | 294;<br>4.3(3.8-<br>4.8) | 1.1(0.9-<br>1.2) | 140;<br>2(1.7-<br>2.4)   | 0.9(0.8-<br>1.0) | 264;<br>3.7(3.3-<br>4.2) | 0.9(0.7-<br>1.2)         | 338;<br>4.8(4.3-<br>5.3) | 1.1(1.1-<br>1.2) | 160;<br>2.3(1.9-<br>2.6) | 1.1(0.8-<br>-1.5) |
| 2015 | 44;<br>0.9(0.7-<br>1.2) | 0.8(0.6-<br>1.1) | 63;<br>1.3(1-<br>1.7)   | 2.1(1.8-<br>2.4)        | 36;<br>0.7(0.5-<br>1)   | 1.9(1.3-<br>2.7)         | 202;<br>4(3.5-<br>4.6)   | 1.0(0.8-<br>1.2) | 265;<br>5.3(4.7-<br>6)   | 1.3(1.1-<br>1.5) | 109;<br>2.2(1.8-<br>2.6) | 1.0(0.8-<br>1.2) | 181;<br>3.4(3-<br>4)     | 0.8(0.6-<br>1.1)         | 225;<br>4.3(3.7-<br>4.9) | 1.0(0.9-<br>1.2) | 102;<br>1.9(1.6-<br>2.4) | 0.9(0.7-<br>-1.2) |

a. Incidence per 1000 PYAR

b. Reference year

Supplementary Table 4 IRRs of presentation to services for self-harm by gender

| Variable                 |       | GP                    |                                      |                       |                                      | Emergency Department  |                                      |                       |                                      | Hospital admission    |                                      |                       |                                      |
|--------------------------|-------|-----------------------|--------------------------------------|-----------------------|--------------------------------------|-----------------------|--------------------------------------|-----------------------|--------------------------------------|-----------------------|--------------------------------------|-----------------------|--------------------------------------|
|                          |       | Male(n=8506)          |                                      | Female(n=16345)       |                                      | Male(n=3387)          |                                      | Female (n=4161)       |                                      | Male (n=4665)         |                                      | Female (n=9304)       |                                      |
|                          |       | Incidence<br>(95% CI) | IRR(95%<br>CI)                       | Incidence<br>(95% CI) | IRR(95%<br>CI)                       | Incidence<br>(95% CI) | IRR(95%<br>CI)                       | Incidence<br>(95% CI) | IRR(95%<br>CI)                       | Incidence<br>(95% CI) | IRR(95%<br>CI)                       | Incidence<br>(95% CI) | IRR(95%<br>CI)                       |
| Age group                | 10-14 | 0.9(0.8-1.0)          | Reference<br>(P <sup>c</sup> <.0001) | 4.2(4.1-4.4)          | Reference<br>(P <sup>c</sup> <.0001) | 1.0(0.9-1.1)          | Reference<br>(P <sup>c</sup> <.0001) | 2.6(2.4-2.8)          | Reference<br>(P <sup>c</sup> <.0001) | 0.5(0.5-0.6)          | Reference<br>(P <sup>c</sup> <.0001) | 2.7(2.6-2.9)          | Reference<br>(P <sup>c</sup> <.0001) |
|                          | 15-19 | 4.2(4.0-4.3)          | 4.6(4.3-5.0)                         | 9.1(8.9-9.3)          | 2.2(2.0-2.3)                         | 4.6(4.4-4.8)          | 4.8(4.2-5.4)                         | 6.5(6.2-6.8)          | 2.5(2.3-2.8)                         | 2.3(2.2-2.4)          | 4.4(4.0-4.9)                         | 5.0(4.9-5.2)          | 1.8(1.7-2.2)                         |
|                          | 20-24 | 4.3(4.2-4.4)          | 4.9(4.5-5.4)                         | 5.5(5.3-5.6)          | 1.3(1.2-1.4)                         | 4.5(4.3-4.7)          | 4.8(4.2-5.5)                         | 4.1(3.9-4.3)          | 1.6(1.4-1.7)                         | 2.3(2.2-2.4)          | 4.6(4.2-5.2)                         | 2.9(2.8-3.0)          | 1.0(1.0-1.1)                         |
| Deprivation <sup>d</sup> | 5     | 1.5(1.4-1.6)          | Reference<br>(P <sup>c</sup> <.0001) | 8.8(8.5-9.0)          | Reference<br>(P <sup>c</sup> <.0001) | 1.7(1.5-1.8)          | Reference<br>(P <sup>c</sup> <.0001) | 7.8(7.4-8.2)          | Reference<br>(P <sup>c</sup> <.0001) | 0.8(0.7-0.8)          | Reference<br>(P <sup>c</sup> <.0001) | 5.0(4.8-5.1)          | Reference<br>(P <sup>c</sup> <.0001) |
|                          | 4     | 1.9(1.8-2.1)          | 1.3(1.2-1.5)                         | 6.9(6.7-7.2)          | 1.2(1.1-1.3)                         | 2.2(2.0-2.5)          | 1.4(1.2-1.6)                         | 5.8(5.4-6.2)          | 1.1(1.0-1.3)                         | 1.1(1.0-1.2)          | 1.5(1.3-1.6)                         | 4.0(3.8-4.2)          | 1.3(1.2-1.4)                         |
|                          | 3     | 2.6(2.5-2.7)          | 1.6(1.4-1.7)                         | 5.9(5.7-6.1)          | 1.4(1.3-1.5)                         | 2.8(2.6-3.0)          | 1.7(1.5-1.9)                         | 4.1(3.8-4.4)          | 1.5(1.3-1.7)                         | 1.4(1.3-1.5)          | 1.6(1.4-1.8)                         | 3.5(3.3-3.6)          | 1.5(1.4-1.7)                         |
|                          | 2     | 4.1(3.9-4.2)          | 2.2(2.0-2.4)                         | 5.1(4.9-5.3)          | 1.7(1.5-1.8)                         | 4.3(4.0-4.6)          | 2.6(2.3-3.0)                         | 2.7(2.5-3.0)          | 1.8(1.6-2.0)                         | 2.4(2.3-2.6)          | 2.5(2.3-2.8)                         | 3.0(2.8-3.1)          | 1.7(1.6-1.9)                         |
|                          | 1     | 5.7(5.5-5.9)          | 3.1(2.8-3.3)                         | 4.2(4.0-4.4)          | 2.1(2.0-2.3)                         | 5.7(5.4-6.0)          | 3.5(3.1-3.8)                         | 2.4(2.2-2.6)          | 2.4(2.2-2.7)                         | 3.1(2.9-3.2)          | 3.2(2.9-3.6)                         | 2.3(2.2-2.4)          | 2.2(2.2-2.4)                         |
| Year                     | 2003  | 3.1(2.9-3.4)          | Reference<br>(P <sup>c</sup> <.0001) | 6.0(5.7-6.4)          | Reference<br>(P <sup>c</sup> <.0001) |                       |                                      |                       |                                      | 1.5(1.3-1.7)          | Reference<br>(P <sup>c</sup> <.0001) | 2.9(2.7-3.2)          | Reference<br>(P <sup>c</sup> <.0001) |
|                          | 2004  | 3.2(2.9-3.4)          | 1.0(0.9-1.2)                         | 6.1(5.8-6.5)          | 1.0(0.9-1.1)                         |                       |                                      |                       |                                      | 1.7(1.5-1.9)          | 1.1(0.9-1.3)                         | 2.9(2.6-3.1)          | 1.0(0.8-1.1)                         |
|                          | 2005  | 3.2(3.0-3.5)          | 1.0(0.9-1.2)                         | 6.2(5.9-6.6)          | 1.0(1.0-1.1)                         |                       |                                      |                       |                                      | 1.6(1.5-1.8)          | 1.1(0.9-1.2)                         | 3.4(3.2-3.7)          | 1.2(1.0-1.4)                         |
|                          | 2006  | 3.2(3.0-3.4)          | 1.0(0.9-1.1)                         | 6.1(5.8-6.5)          | 1.0(0.9-1.1)                         |                       |                                      |                       |                                      | 1.8(1.6-2.0)          | 1.2(1.0-1.3)                         | 3.6(3.4-3.9)          | 1.2(1.1-1.4)                         |
|                          | 2007  | 3.3(3.1-3.6)          | 1.0(0.9-1.2)                         | 6.8(6.5-7.2)          | 1.1(1.0-1.2)                         |                       |                                      |                       |                                      | 2.0(1.9-2.2)          | 1.3(1.1-1.5)                         | 3.9(3.7-4.2)          | 1.3(1.2-1.5)                         |

| 2008              | 3.5(3.2-3.7) | 1.1(0.9-1.3) | 6.8(6.5-7.2) | 1.1(1.0-1.2) |              |                                   |              |                                   | 1.9(1.7-2.0) | 1.2(1.0-1.4) | 3.8(3.5-4.0) | 1.3(1.1-1.5) |  |
|-------------------|--------------|--------------|--------------|--------------|--------------|-----------------------------------|--------------|-----------------------------------|--------------|--------------|--------------|--------------|--|
| 2009              | 3.1(2.8-3.3) | 0.9(0.8-1.1) | 5.9(5.5-6.2) | 1.0(0.9-1.1) |              |                                   |              |                                   | 1.7(1.5-1.8) | 1.1(0.9-1.3) | 3.2(3.0-3.5) | 1.1(1.0-1.3) |  |
| 2010              | 3.3(3.1-3.6) | 1.0(0.9-1.2) | 6.0(5.7-6.3) | 1.0(0.9-1.1) |              |                                   |              |                                   | 1.6(1.4-1.8) | 1.0(0.9-1.2) | 3.1(2.9-3.4) | 1.1(0.9-1.2) |  |
| 2011              | 3.0(2.8-3.2) | 0.9(0.8-1.0) | 5.9(5.5-6.2) | 1.0(0.9-1.1) | 3.0(2.8-3.2) | Reference (P <sup>c</sup> <.0001) | 3.8(3.6-4.1) | Reference (P <sup>c</sup> <.0001) | 1.7(1.5-1.8) | 1.1(0.9-1.2) | 3.4(3.2-3.7) | 1.2(1.0-1.3) |  |
| 2012              | 2.9(2.6-3.1) | 0.9(0.8-1.0) | 6.3(5.9-6.6) | 1.0(0.9-1.1) | 3.6(3.4-3.9) | 1.2(1.1-1.3)                      | 4.2(3.9-4.5) | 1.1(1.0-1.2)                      | 1.6(1.5-1.8) | 1.0(0.9-1.2) | 3.5(3.2-3.7) | 1.2(1.0-1.4) |  |
| 2013              | 2.8(2.6-3.1) | 0.9(0.8-1.0) | 6.8(6.4-7.1) | 1.1(1.0-1.3) | 3.3(3.1-3.6) | 1.1(1.0-1.2)                      | 4.6(4.3-4.9) | 1.2(1.1-1.3)                      | 1.7(1.6-1.9) | 1.1(0.9-1.3) | 4.2(3.9-4.5) | 1.5(1.2-1.7) |  |
| 2014              | 2.7(2.4-2.9) | 0.8(0.7-1.0) | 6.0(5.7-6.4) | 1.0(0.9-1.1) | 3.4(3.1-3.6) | 1.1(1.0-1.2)                      | 4.4(4.1-4.7) | 1.2(1.1-1.3)                      | 1.6(1.5-1.8) | 1.1(0.9-1.2) | 4.1(3.8-4.4) | 1.4(1.2-1.6) |  |
| 2015 <sup>e</sup> | 2.8(2.6-3.1) | 0.9(0.7-1.0) | 6.4(6.0-6.8) | 1.0(0.9-1.2) | 3.7(3.4-4.0) | 1.2(1.1-1.4)                      | 5.2(4.8-5.6) | 1.4(1.2-1.5)                      | 1.6(1.4-1.8) | 1.0(0.9-1.2) | 4.5(4.1-4.8) | 1.5(1.3-1.8) |  |

- a. Emergency department data from 2011 onwards only  
b. Adjusted for calendar year, age and deprivation  
c. Based on Wald test  
d. Deprivation: 1 = most deprived; 5 = least deprived  
e. Data collected in 2015 up until 30th September –denominator for incidence rate adjusted accordingly

**Supplementary Table 5 n(%;95% CI) of hospital admissions for self-harm by admission speciality, age group and gender**

|                     |             | Specialties       | Specialty             |                       | Medicine         |                       |                      |
|---------------------|-------------|-------------------|-----------------------|-----------------------|------------------|-----------------------|----------------------|
| Age group           | 10-14 years | 23(1;1-1)         | <5                    | 2740(99;98-99)        | <5               | <5                    | <5                   |
|                     | 15-19 years | 74(3;3-3)         | <>(16;15-18)          | <>(30;28-31)          | <>(1;1-1)        | <>(36;34-38)          | <>(13;12-15)         |
|                     | 20-24 years | 217(6;5-7)        | 813(22;20-23)         | <5                    | 47(1;1-2)        | 2035(54;53-56)        | 642(17;16-18)        |
| Sex                 | Male        | 186(7;6-8)        | 449(17;16-19)         | 502(19;18-21)         | 32(1;1-2)        | 1077(41;40-43)        | 353(14;12-15)        |
|                     | Female      | 128(2;2-3)        | 717(12;11-13)         | 2870(47;46-49)        | 37(1;0-1)        | 1736(29;27-30)        | 578(10;9-10)         |
| <b>All (n=8665)</b> |             | <b>314(4;3-4)</b> | <b>1166(13;13-14)</b> | <b>3372(39;38-40)</b> | <b>69(1;1-1)</b> | <b>2813(33;32-33)</b> | <b>931(11;10-11)</b> |

a. Encompasses all other specialties

<>. Numbers excluded to make small numbers

**Supplementary Table 6 Proportion of ED attendances associated with hospital admission by method gender and age group 01.08.2009-30.09.2015**

|             |        | All self-harm      |                                        | Self-poisoning     |                                        | Self-injury        |                                        | Both Self-poisoning and injury |                                        |
|-------------|--------|--------------------|----------------------------------------|--------------------|----------------------------------------|--------------------|----------------------------------------|--------------------------------|----------------------------------------|
|             |        | ED attendances (n) | With hospital admission (n (%; 95% CI) | ED attendances (n) | With hospital admission (n (%; 95% CI) | ED attendances (n) | With hospital admission (n (%; 95% CI) | ED attendances (n)             | With hospital admission (n (%; 95% CI) |
| Male        |        | 5059               | 1751(35;33-36)                         | 1065               | 468(44;41-47)                          | 3317               | 1048(32;30-33)                         | 677                            | 235(35;31-38)                          |
| Female      |        | 6780               | 3104(46;45-47)                         | 1670               | 936(56;54-58)                          | 4031               | 1655(41;40-43)                         | 1079                           | 513(48;45-51)                          |
| 10-15 years | All    | 2108               | 1456(69;67-71)                         | 517                | 448(87;83-89)                          | 1252               | 741(59;56-62)                          | 339                            | 267(79;74-83)                          |
|             | Male   | 560                | 274(49;45-53)                          | 91                 | 63(69;59-78)                           | 386                | 359(93;90-95)                          | 83                             | 49(59;48-69)                           |
|             | Female | 1548               | 1182(76;74-78)                         | 426                | 385(90;87-93)                          | 866                | 700(81;78-83)                          | 256                            | 218(85;80-89)                          |
| 16-18 years | All    | 3444               | 1239(36;34-38)                         | 751                | 349(46;43-50)                          | 2166               | 719(33;31-35)                          | 527                            | 171(32;29-37)                          |
|             | Male   | 1319               | 382(29;27-31)                          | 263                | 106(40;35-46)                          | 888                | 242(27;24-30)                          | 168                            | 34(20;15-27)                           |

|              |        |              |                       |             |                       |             |                       |             |                      |
|--------------|--------|--------------|-----------------------|-------------|-----------------------|-------------|-----------------------|-------------|----------------------|
|              | Female | 2125         | 857(40;38-42)         | 488         | 243(50;45-54)         | 1278        | 477(37;35-40)         | 359         | 137(38;33-43)        |
| 19-24 years  | All    | 6287         | 2160(34;33-36)        | 1467        | 607(41;39-44)         | 3930        | 1243(32;30-33)        | 890         | 310(35;32-38)        |
|              | Male   | 3180         | 1095(34;33-36)        | 711         | 299(42;38-46)         | 2043        | 644(32;30-34)         | 426         | 152(36;31-40)        |
|              | Female | 3107         | 1065(34;33-36)        | 756         | 308(41;37-44)         | 1887        | 599(32;30-34)         | 464         | 158(34;30-38)        |
| <b>Total</b> |        | <b>11839</b> | <b>4855(41;40-42)</b> | <b>2735</b> | <b>1404(51;49-53)</b> | <b>7348</b> | <b>2703(37;36-38)</b> | <b>1756</b> | <b>748(43;40-45)</b> |
